# Supplementary material for: Dissecting the RecA-(In)dependent Response to Mitomycin C in Mycobacterium tuberculosis Using Transcriptional Profiling and Proteomics Analyses
Source: MDPI journal article supplement (doi:10.3390/cells10051168), 2021-05-11
Supplement: s1 [file s1]

## Dissecting the RecA-(In)dependent Response to Mitomycin C in *Mycobacterium tuberculosis* Using Transcriptional Profiling and Proteomic Analyses

Anna Brzostek, Przemysław Płociński, Aneta Ciszewska, Filip Gąsior, Alina Minias, Jakub Pawełczyk,  
Bożena Dziadek, Dominik Strapagiel and Jarosław Dziadek

### Supplementary data:

Figure S1. Co-occurrence of DNA repair genes.

Figure S2. Zoom in at the genomic location of putative PafBC DNA binding motifs within the promoter regions of chosen DNA repair genes. Transcription traces from the RNA Seq experiments are shown above the relevant DNA sequences of the promoter regions of *ruvC* (A), *uvrD* (B) and *radA* (C) genes.

Figure S3. Comparison between the MEME-derived DNA binding consensus of the *M. tuberculosis* LexA and the DNA binding consensus reported for *E. coli*'s ArsR regulator (A) [35]. Clustal Omega alignment of *E.coli* and *M. tuberculosis* ArsR orthologues (B).

Figure S4. Transcriptional traces of DNA repair genes overproduced in response to MMC treatment in the  $\Delta recA$ -*pafBC*<sup>CRISPRi/dCas9</sup> strain, associated with the presence of putative SOS-box-like motifs (A,B) and an unresponsive control (C).

Figure S5. Transcriptional traces of the LexA region indicate that PafBC is not involved in the regulation of *lexA* expression but the *rv2719c* operon instead in agreement with its directionality. The expression of LexA is repressed in the absence of RecA coprotease activity in mycobacterial cell.

Table S1. Bacterial strains.

Table S2. Plasmids and primers.

Table S3. Variability and dN/ds. of DNA repair genes *M. tuberculosis*.

Table S4. SNP variation of DNA repair genes of *M. tuberculosis* – see Excel file.

Table S5. Genes differentially expressed between H37Rv and  $\Delta recA$  strains cultured in the presence of 5 ng/ml mitomycin C– see Excel file.

Table S6. MaxQuant proteomics quantification for whole cell lysates obtained from mycobacterial strains cultured in the presence of 5ng/ml mitomycin C– see Excel file.

Table S7. Genes differentially expressed between  $\Delta recA$  and  $\Delta recA$ , *pafBC*<sup>CRISPRi/dCas9</sup> strains cultured in the presence of 5 ng/ml mitomycin C with FIMO predicted PafBC regulatory motif within their promoter regions– see Excel file.

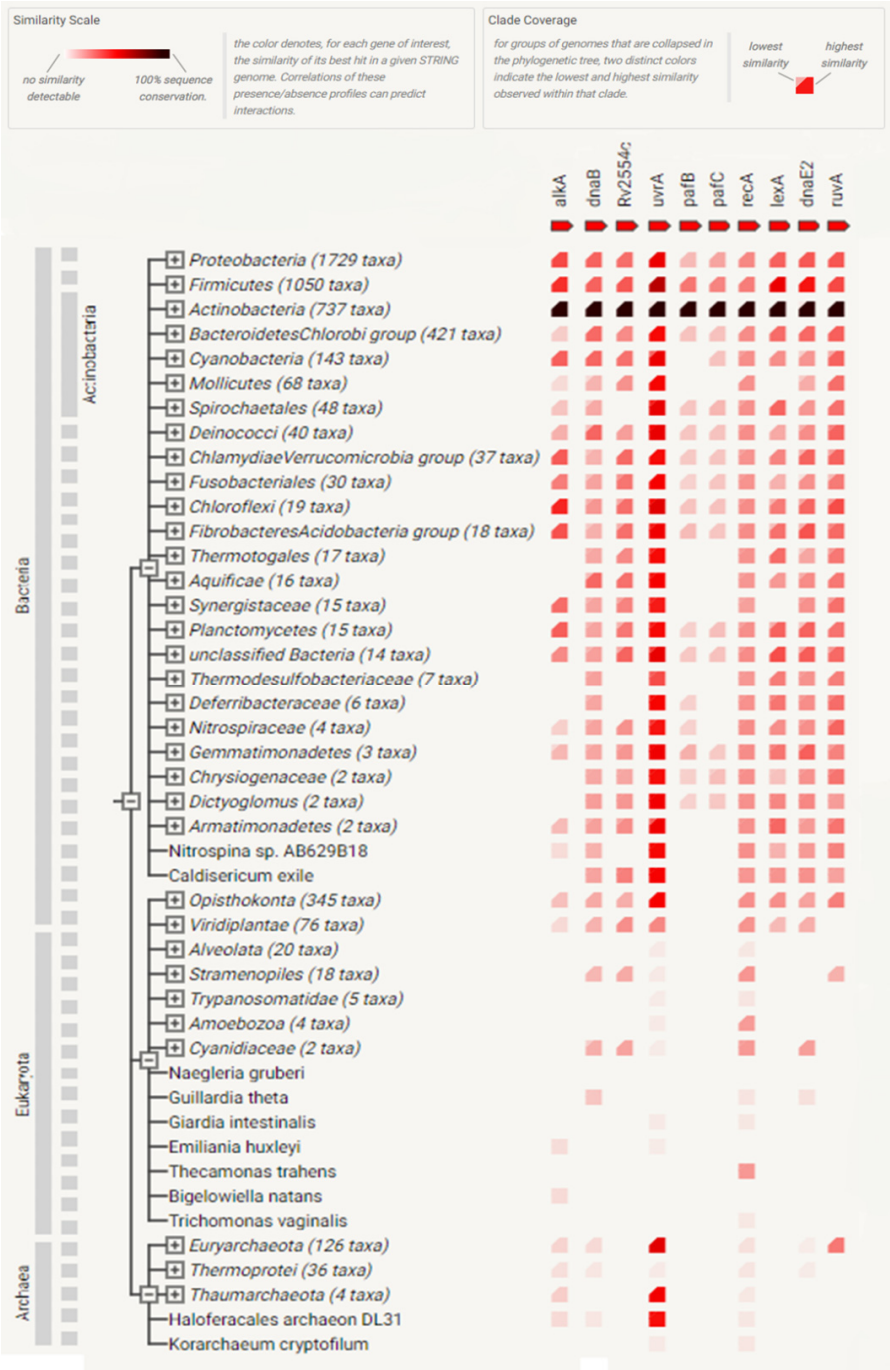

**Figure S1.** Co-occurrence of DNA repair genes. We performed virtual detection of gene homologs across phylogenetic tree of life. We used co-occurrence gene detection of STRING Protein software to identify homologs of *M. tuberculosis* genes.

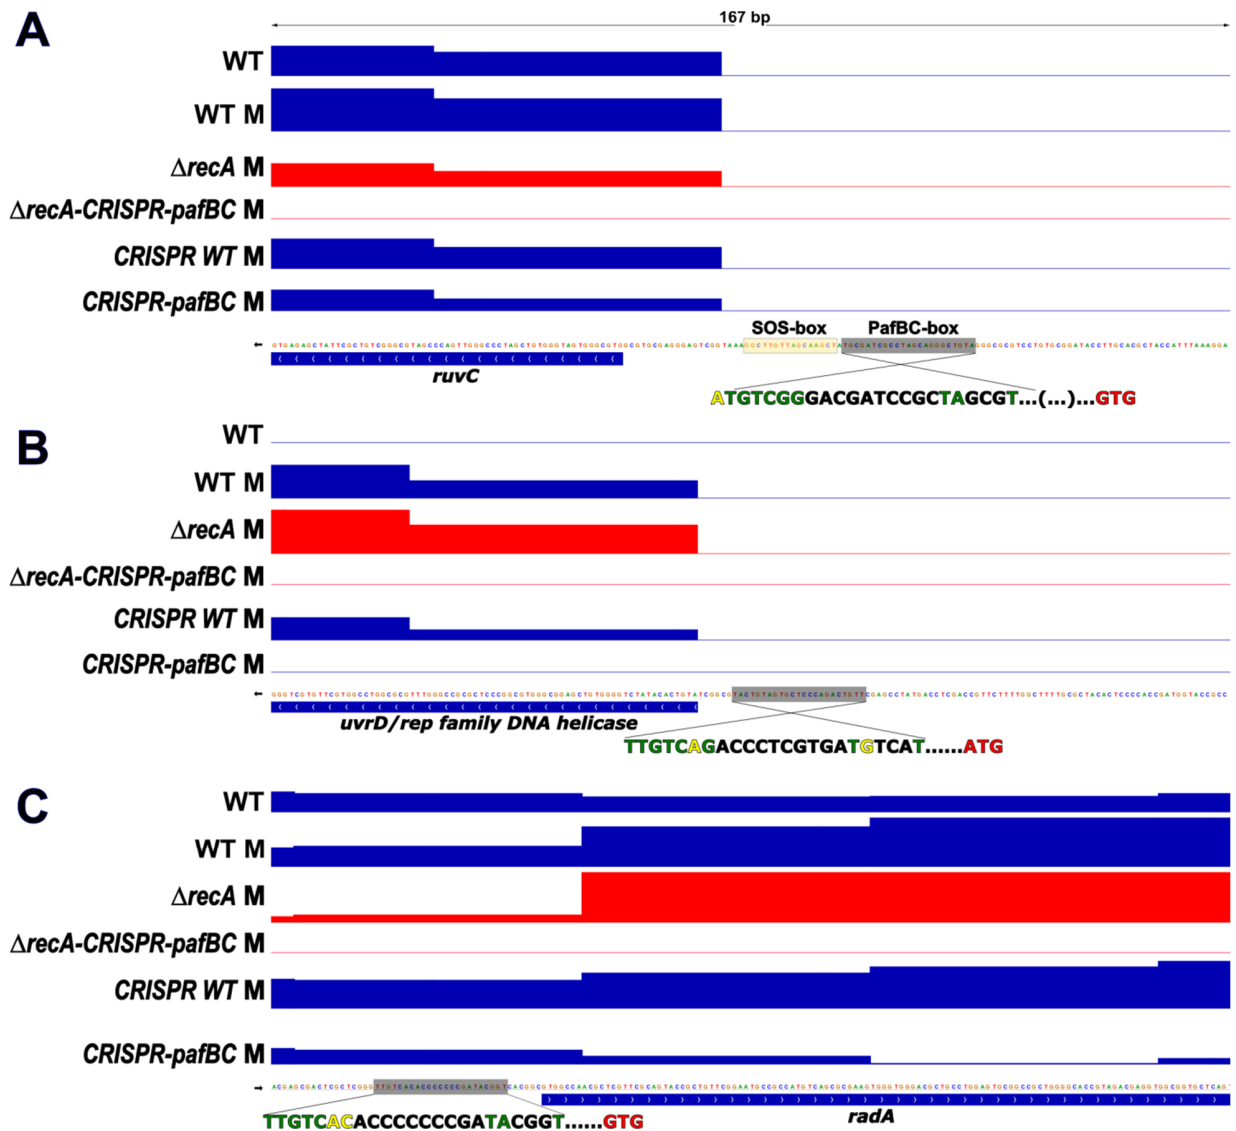

**Figure S2.** Zoom in at the genomic location of PafBC DNA binding motifs within the promoter regions of chosen DNA repair genes. Transcription traces from the RNA Seq experiments are shown above the relevant DNA sequences of the promoter regions of *ruvC* (A), *adnA/uvrD* (B) and *radA* (C) genes.

A

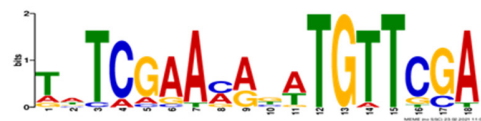

LexA SOS box

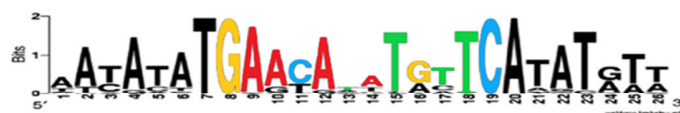

ArsR binding motif

B

CLUSTAL O(1.2.4) multiple sequence alignment

|        |                                                             |     |
|--------|-------------------------------------------------------------|-----|
| eco    | MS-----FLLPIQLFKILADETRLGIVL--LLSELGELCV                    | 33  |
| Rv2642 | MSNLHPLPEVASCVVAPLVREPLNPPAAAEAAAFKALADPVRLQLLSVASRAGGEACV  | 60  |
|        | * * * * *                                                   |     |
| eco    | CDLCTALDQSQPKISRHLALLRESGLLLDRKQGKWHYRLSPHIPAWAAKIIDEAWRCEQ | 93  |
| Rv2642 | CDISAGVEVSQPTISHHLKVLRDAGLLTSRRRASWVYAVVPEALTVLSNLLSVHADA-- | 118 |
|        | * * * * *                                                   |     |
| eco    | EKVQAIVRNLRQNCSGDSKINICS                                    | 117 |
| Rv2642 | --APAL-----GAPA-----                                        | 126 |
|        | * * * * *                                                   |     |

**Figure S3.** Comparison between the MEME-derived DNA binding consensus of the *M. tuberculosis* LexA and the DNA binding consensus reported for *E. coli*'s ArsR regulator (A) [35]. Clustal Omega alignment of *E. coli* and *M. tuberculosis* ArsR orthologues (B).

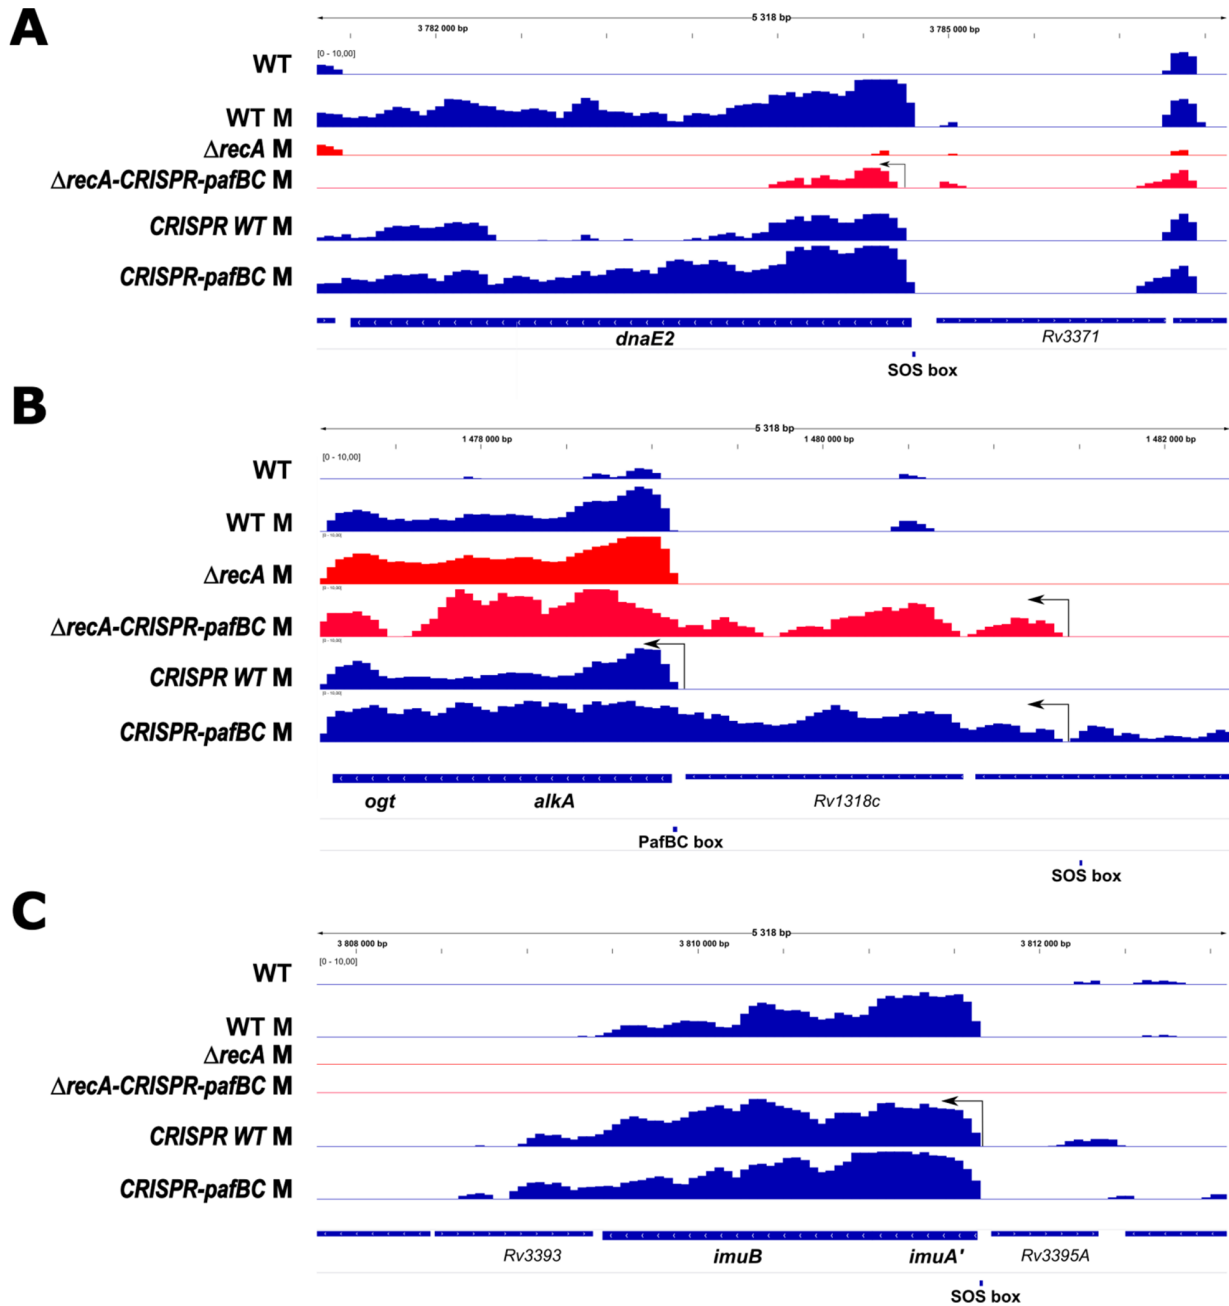

**Figure S4.** Transcriptional traces of DNA repair genes overproduced in response to MMC treatment in the  $\Delta recA$ - $pafBC^{CRISPR/dCas9}$  strain, associated with the presence of putative SOS-box motifs (A,B) and an unresponsive control (C).

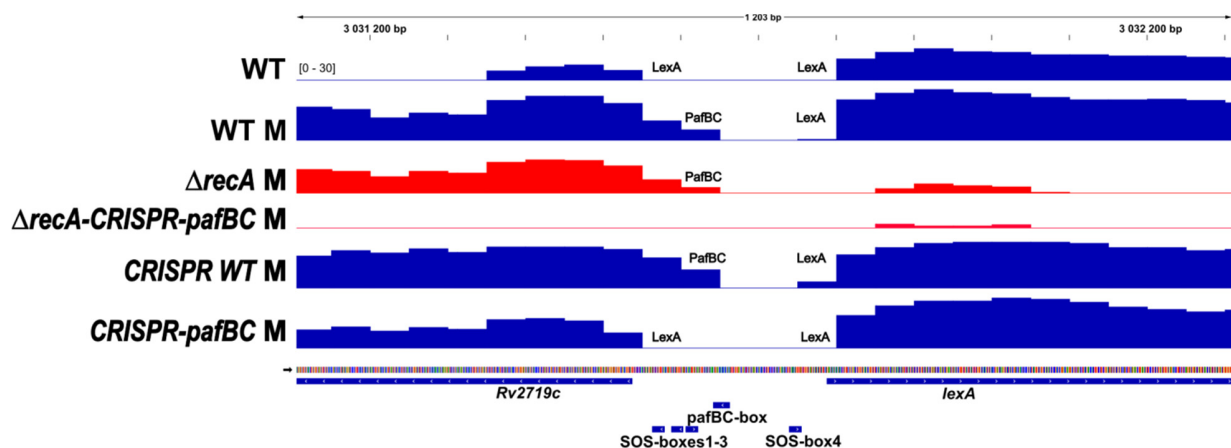

**Figure S5.** Transcriptional traces of the LexA region indicate that PafBC is not involved in the regulation of *lexA* expression but the *rv2719c* operon instead in agreement with its directionality. The expression of LexA is repressed in the absence of RecA coprotease activity in mycobacterial cell.

**Table S1.** Bacterial strains.

| Name/Genotype                                | STRAINS                                                                                         | Reference             |
|----------------------------------------------|-------------------------------------------------------------------------------------------------|-----------------------|
| Top10F'                                      | <i>Escherichia coli</i> strain                                                                  | Invitrogen            |
| <i>Mtb</i> H37Rv                             | <i>M. tuberculosis</i> - wild type                                                              | Laboratory stock      |
| ⊗ <i>recA</i>                                | <i>M. tuberculosis</i> defective in the synthesis of RecA                                       | Brzostek et al., 2014 |
| <i>Mtb</i> CRISPR-Cas9                       | <i>M. tuberculosis</i> carrying integrative pLJR965                                             | This study            |
| <i>Mtb</i> CRISPR-Cas9-PafBC                 | <i>M. tuberculosis</i> with inducible depletion of PafBC                                        | This study            |
| <i>Mtb</i> ⊗ <i>recA</i> - CRISPR-Cas9-PafBC | <i>M. tuberculosis</i> with inducible depletion of PafBC and defective in the synthesis of RecA | This study            |

**Table S2.** Plasmids and primers.

| Plasmids Used for This Study | Vector type                                | Source                                       |
|------------------------------|--------------------------------------------|----------------------------------------------|
| pJET 1.2/blunt               | Blunt cloning vector, Amp <sup>R</sup>     | Thermo Scientific                            |
| pHis Parallel                | Expression vector, Ap <sup>R</sup>         | Sheffield et al.,1998                        |
| pJLR965                      | CRISPR-Cas9 cloning vector Km <sup>R</sup> | Rock JM et al., 2017                         |
| Primers Used in This Study   |                                            |                                              |
| Name of oligo                | Sequence (5'>3')                           | Application                                  |
| RvrecA-BglII-F               | cagatctgATGACGCAGACCCCCGATCG               | <i>recA</i> for pHis Parallel                |
| RvrecA -EcoRI-R              | cgaattctcaGAAGTCGACGGGGGCGGG               |                                              |
| Crispr/Cas9 -F               | GATCGAGATGGCCCCGCGAGA                      | CRISPR Cas9 recombinant strains verification |
| Crispr/Cas9-R                | CACGGCGTGGTGGTGGTAGGT                      |                                              |
| pafBC-sgRNA-S                | GGAACCTGCGCTCCGATCCGGGACAG                 | CRISPR -Cas9 PafBC recombinant strain        |
| pafBC-sgRNA-R                | AAACCTGTCCCGGATCGGAGCGCAGGT                |                                              |

**Table S3.** Variability and dN/ds. of DNA repair genes *M. tuberculosis*.

|       |         | Essentiality In<br>Vitro (deJesus) | Essentiality<br>Infection | dN/ds.      | Total<br>Number<br>of Sites | No. of<br>Polymorphic<br>Sites | No. of<br>Polymorphic<br>Sites per<br>100 bp | Number of<br>Unique<br>Sequences |
|-------|---------|------------------------------------|---------------------------|-------------|-----------------------------|--------------------------------|----------------------------------------------|----------------------------------|
| alkA  | Rv1317c | non-essential                      | non-essential             | 0.925940383 | 1491                        | 51                             | 3.420523139                                  | 51                               |
| dnaB  | Rv0058  | essential                          |                           | 1.026848531 | 2625                        | 91                             | 3.466666667                                  | 92                               |
| dnaE2 | Rv3370c | non-essential                      | non-essential             | 0.752216517 | 3240                        | 98                             | 3.024691358                                  | 95                               |
| lexA  | Rv2720  | growth-defect                      | non-essential             | 0.69368535  | 711                         | 29                             | 4.078762307                                  | 30                               |
| pafB  | Rv2096c | non-essential                      | non-essential             | 0.749597961 | 999                         | 26                             | 2.602602603                                  | 27                               |
| pafC  | Rv2095c | non-essential                      | non-essential             | 1.19693565  | 951                         | 35                             | 3.680336488                                  | 36                               |
| recA  | Rv2737c | non-essential<br>(growth defect)   | non-essential             | 0.862395437 | 2374                        | 42                             | 1.769165965                                  | 44                               |
| ruvA  | Rv2593c | growth-defect                      | non-essential             | 0.320652067 | 591                         | 19                             | 3.214890017                                  | 19                               |
| ruvX  | Rv2554c | essential                          |                           | 1.745289611 | 513                         | 12                             | 2.339181287                                  | 13                               |
| uvrA  | Rv1638  | non-essential                      | non-essential             | 0.401143688 | 2919                        | 77                             | 2.637889688                                  | 71                               |
